# Supplementary material for: Critical assessment of different methods for quantitative measurement of metallodrug-protein associations
Source: PubMed Central journal article supplement (PMC6208971; doi:10.1007/s00216-018-1328-8), 2018-08-29
Supplement: 216_2018_1328_MOESM1_ESM.pdf [file 216_2018_1328_MOESM1_ESM.pdf]

**Analytical and Bioanalytical Chemistry**

**Electronic Supplementary Material**

**Critical assessment of different methods for quantitative measurement  
of metallodrug-protein associations**

Luis Galvez, Sarah Theiner, Márkó Grabarics, Christian R. Kowol, Bernhard K. Keppler,  
Stephan Hann, Gunda Koellensperger

**Table S1** ICP-MS operation parameters and chromatographic conditions for the kinetic studies of KP2156 and KP2157 in FCS

| ICP-QMS iCAP Thermo Scientific operation parameters           |                                                                                     |
|---------------------------------------------------------------|-------------------------------------------------------------------------------------|
| Nebulizer                                                     | PFA-ST                                                                              |
| Spray chamber                                                 | Cyclonic                                                                            |
| Nebulizer gas flow                                            | 1.01 L/min                                                                          |
| Aux. gas                                                      | 0.99 L/min                                                                          |
| Plasma gas                                                    | 14 L/min                                                                            |
| Reaction gas                                                  | 0.370 mL/min                                                                        |
| ICP RF Power                                                  | 1550 W                                                                              |
| m/z measured                                                  | 194.97, 47.97                                                                       |
| Thermo Scientific Transcend system chromatographic conditions |                                                                                     |
| HPLC Column                                                   | Acquity UPLC Protein BEH SEC, 4.6 x 150 mm, 200A, 1.7 $\mu$ m, 10kDa-500kDa, Waters |
| Eluent                                                        | 50 mM CH <sub>3</sub> COONH <sub>4</sub> , pH = 6.0                                 |
| Flow Rate                                                     | 400 $\mu$ L/min                                                                     |
| Injection Volume                                              | 2 $\mu$ L                                                                           |
| Column Temperature                                            | 37°C                                                                                |

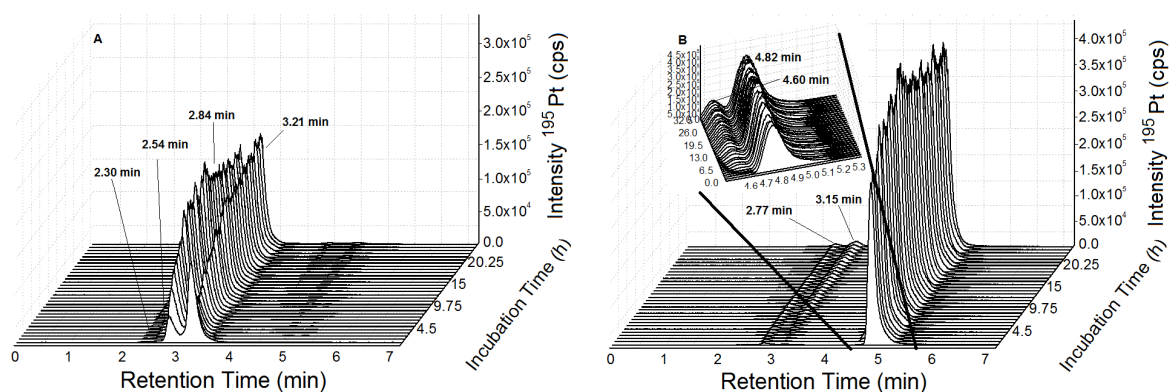

**Fig. S1** Chromatographic separations with the column Acquity UPLC Protein BEH SEC, 4.6 x 150 mm, 200A, 1.7  $\mu$ m, 10kDa-500kDa, of the platinum complexes ( $\sim$ 1  $\mu$ M) upon incubation in FCS during 24h at 37°C (corresponding approximately to a molar ratio of drug:albumin of  $\sim$ 1:600). (A) KP2156 shows a high binding to albumin (3.21, 2.84, 2.54 and 2.30 min). The free drug could not be observed. (B) KP2157 shows a lower binding to albumin (3.15 and 2.77 min). The free drug could be observed at 4.82 min. A hydrolysis product was observed in kinetics studies of the drug in water as well as in the incubation in FCS (4.60 min)

**Table S2** Analytical figures of merit of the SEC and UHPLC SEC columns

| Column                                                            | Compound   | Retention Time (min) | N (m <sup>-1</sup> ) <sup>a</sup> | H (μm) <sup>b</sup> |
|-------------------------------------------------------------------|------------|----------------------|-----------------------------------|---------------------|
| BioBasic SEC-60 A, 4.6x250 mm, 5μm, Thermo.                       | Methionine | 12.9                 | 17072                             | 59                  |
| Acquity UPLC Protein BEH SEC, 4.6 x 150 mm, 125A, 1.7 μm, Waters. | Methionine | 5.34                 | 61960                             | 16                  |

<sup>a</sup>Theoretical Plate Number m<sup>-1</sup>.

<sup>b</sup>Theoretical Plate Height μm.

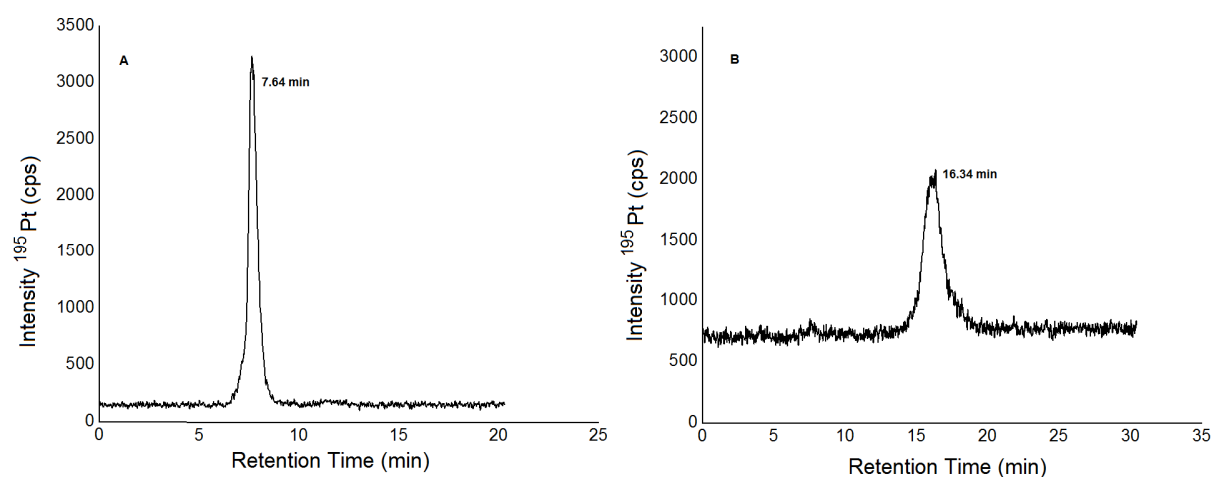

**Fig. S2** SEC chromatograms (BioBasic SEC-60 A, 4.6x250 mm, 5μm) of (A) an incubation of KP2156 0.1μM (20 μg/L of Pt) 1:10 in FCS during 45 min at 37°C and diluted 1:10 in water prior to the analysis. . A high binding of this compound to albumin could be observed (7.64 min). (B) An incubation of KP2157 0.1 μM (20 μg/L of Pt) 1:10 in FCS during 45 min at 37°C and diluted 1:10 in water prior to the analysis. This compound showed no binding to albumin appearing mainly as free drug (16.34 min)

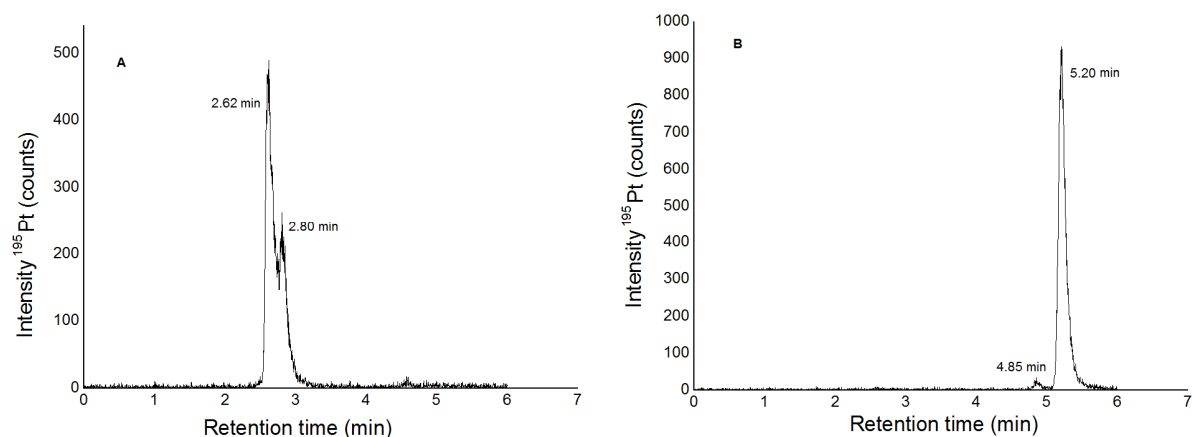

**Fig. S3** UHPLC SEC chromatograms (Acquity UPLC Protein BEH SEC, 4.6 x 150 mm, 125A, 1.7  $\mu\text{m}$ ) of (A) an incubation of KP2156 0.1 $\mu\text{M}$  (20  $\mu\text{g/L}$  of Pt) 1:10 in FCS during 45 min at 37°C. A high binding of this compound to the monomer and the dimer of albumin could be observed (2.62 and 2.80 min respectively) (B) an incubation of KP2157 0.1  $\mu\text{M}$  (20  $\mu\text{g/L}$  of Pt) 1:10 in FCS during 45 min at 37°C. This compound showed no binding to albumin appearing mainly as free drug (5.20 min). A hydrolysis product was observed in the standard of the drug in water as well as in the incubation in FCS (4.85 min)

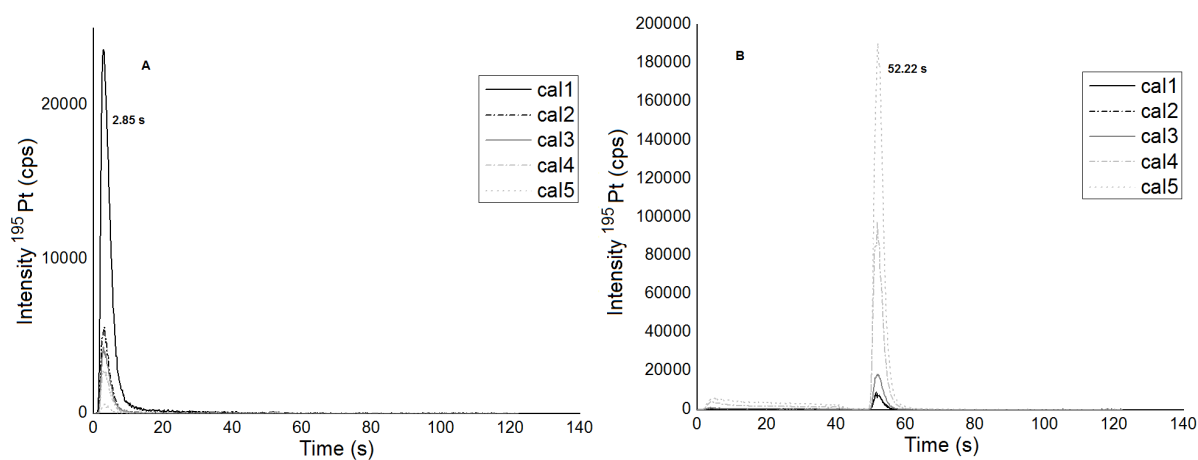

**Fig. S4** TFC chromatograms (Fluoro XL 0.5x50 mm) of (A) standards of KP2156 in FCS 1:10 at different concentrations. (B) standards of KP2157 in water at different concentrations
